# Supplementary material
Source: Springer Nature journal article supplement (https://www.springermedizin.de/resource/supplementary/12990_2010_298_MOESM2_ESM.pdf/9612978)

Conduction Velocity Histogram - 1.5cm avg Conduction Distance - 34 Cells

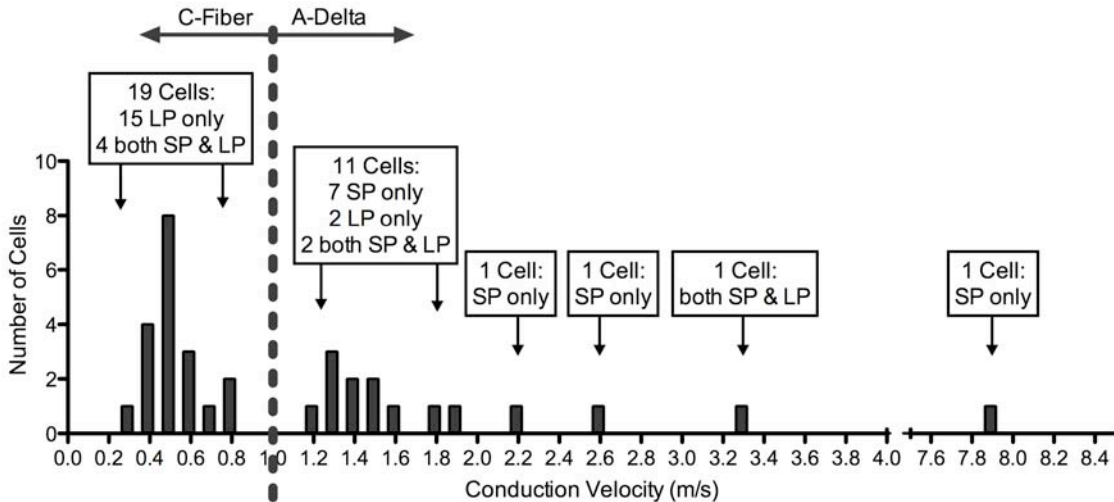

Supplement: MOESM2 [file 9612978]
